# Supplementary material
Source: publisher figshare collection journal article supplement (https://karger.figshare.com/ndownloader/files/8713333)
Supplement: Supplementary file 1 [file 8713333]

**Table 1.** Expression of nuclear and cytoplasmic Smad3 in comparison to clinicopathological parameters

|                                  | Smad3-nuclear     |                     |                | Smad3-cytoplasmic |                     |                    |
|----------------------------------|-------------------|---------------------|----------------|-------------------|---------------------|--------------------|
|                                  | Negative<br>(n=7) | Positive<br>(n=194) | <i>p</i> value | Negative<br>(n=5) | Positive<br>(n=196) | <i>p</i> value     |
| Gender                           |                   |                     | 1.000          |                   |                     | 1.000              |
| Male                             | 5 (71.4%)         | 127 (65.5%)         |                | 3 (60.0%)         | 129 (65.8%)         |                    |
| Female                           | 2 (28.6%)         | 67 (34.5%)          |                | 2 (40.0%)         | 67 (34.2%)          |                    |
| Age at diagnosis (years)         | 54.9 ± 13.5       | 58.8 ± 11.8         | 0.396          | 56.0 ± 12.5       | 58.7 ± 11.9         | 0.619              |
| Tumor size (cm)                  | 2.9 ± 2.6         | 4.7 ± 1.9           | 0.016          | 2.0 ± 1.0         | 4.7 ± 1.9           | 0.003              |
| AJCC stage                       |                   |                     | 0.537          |                   |                     | 0.753              |
| IIIA                             | 0 (0%)            | 20 (10.3%)          |                | 0 (0%)            | 20 (10.2%)          |                    |
| IIIB                             | 5 (71.4%)         | 141 (72.7%)         |                | 4 (80.0%)         | 142 (72.4%)         |                    |
| IIIC                             | 2 (28.6%)         | 33 (17.0%)          |                | 1 (20.0%)         | 34 (17.3%)          |                    |
| Cell differentiation             |                   |                     | 0.007          |                   |                     | 0.135              |
| WD / MD                          | 3 (42.9%)         | 171 (88.1%)         |                | 3 (60.0%)         | 171 (87.2%)         |                    |
| PD / Others                      | 4 (57.1%)         | 23 (11.9%)          |                | 2 (40.0%)         | 25 (12.8%)          |                    |
| Lymphatic invasion               |                   |                     | 0.247          |                   |                     | 0.159              |
| No                               | 6 (85.7%)         | 115 (59.3%)         |                | 5 (100%)          | 116 (59.2%)         |                    |
| Yes                              | 1 (14.3%)         | 79 (40.9%)          |                | 0 (0%)            | 80 (40.8%)          |                    |
| Vascular invasion                |                   |                     | 1.000          |                   |                     | 1.000              |
| No                               | 7 (100%)          | 172 (88.7%)         |                | 5 (100%)          | 174 (88.8%)         |                    |
| Yes                              | 0 (0%)            | 22 (11.3%)          |                | 0 (0%)            | 22 (11.2%)          |                    |
| Perineural invasion              |                   |                     | 0.350          |                   |                     | 0.585              |
| No                               | 7 (100%)          | 155 (79.9%)         |                | 5 (100%)          | 157 (80.1%)         |                    |
| Yes                              | 0 (0%)            | 39 (20.1%)          |                | 0 (0%)            | 39 (19.9%)          |                    |
| Number of harvested lymph nodes  |                   |                     | 0.005          |                   |                     | 0.003              |
| < 12                             | 6 (85.7%)         | 58 (29.9%)          |                | 5 (100%)          | 59 (30.1%)          |                    |
| 12 ≤                             | 1 (14.3%)         | 136 (70.1%)         |                | 0 (0%)            | 137 (69.9%)         |                    |
| Proximal resection margin (cm)   | 13.9 ± 4.3        | 11.8 ± 8.8          | 0.516          | 12.3 ± 3.8        | 11.8 ± 8.7          | 0.903              |
| Distal resection margin (cm)     | 1.1 ± 1.1         | 2.4 ± 1.3           | 0.009          | 1.0 ± 1.2         | 2.4 ± 1.3           | 0.016              |
| Circumferential resection margin |                   |                     | 1.000          |                   |                     | 1.000              |
| Negative                         | 7 (100%)          | 187 (96.4%)         |                | 5 (100%)          | 189 (96.4%)         |                    |
| Positive                         | 0 (0%)            | 7 (3.6%)            |                | 0 (0%)            | 7 (3.6%)            |                    |
| Preoperative CCRT                |                   |                     | < 0.001        |                   |                     | < 0.001            |
| No                               | 1 (14.3%)         | 170 (87.6%)         |                | 0 (0%)            | 171 (87.2%)         |                    |
| Yes                              | 6 (85.7%)         | 24 (12.4%)          |                | 5 (100%)          | 25 (12.8%)          |                    |
| Adjuvant treatment               |                   |                     | 0.080          |                   |                     | 0.040 <sup>1</sup> |
| No                               | 0 (0%)            | 10 (5.3%)           |                | 0 (0%)            | 10 (5.2%)           |                    |
| Chemotherapy                     | 6 (85.7%)         | 81 (42.9%)          |                | 5 (100%)          | 82 (42.9%)          |                    |
| CCRT                             | 1 (14.3%)         | 98 (51.9%)          |                | 0 (0%)            | 99 (51.8%)          |                    |
| Preoperative CEA (ng/mL)         |                   |                     | 1.000          |                   |                     | 0.658              |
| ≤ 5                              | 5 (71.4%)         | 118 (64.5%)         |                | 4 (80.0%)         | 119 (64.3%)         |                    |
| 5 <                              | 2 (28.6%)         | 65 (35.5%)          |                | 1 (20.0%)         | 66 (35.7%)          |                    |

<sup>1</sup> Adjusted *p* value is 0.120

**Table 2.** Expression of nuclear and cytoplasmic Smad4 in comparison to clinicopathological parameters

|                                  | Smad4-nuclear      |                     |                | Smad4-cytoplasmic  |                     |                |
|----------------------------------|--------------------|---------------------|----------------|--------------------|---------------------|----------------|
|                                  | Negative<br>(n=96) | Positive<br>(n=105) | <i>p</i> value | Negative<br>(n=78) | Positive<br>(n=123) | <i>p</i> value |
| Gender                           |                    |                     | 0.036          |                    |                     | 0.498          |
| Male                             | 56 (58.3%)         | 76 (72.4%)          |                | 49 (62.8%)         | 83 (67.5%)          |                |
| Female                           | 40 (41.7%)         | 29 (27.6%)          |                | 29 (37.2%)         | 40 (32.5%)          |                |
| Age at diagnosis (years)         | 57.8 ± 11.8        | 59.4 ± 11.9         | 0.342          | 56.7 ± 11.7        | 59.8 ± 11.9         | 0.067          |
| Tumor size (cm)                  | 4.4 ± 1.9          | 4.8 ± 1.9           | 0.177          | 4.7 ± 2.0          | 4.6 ± 1.9           | 0.598          |
| AJCC stage                       |                    |                     | 0.083          |                    |                     | 0.504          |
| IIIA                             | 5 (5.2%)           | 15 (14.3%)          |                | 6 (7.7%)           | 14 (11.4%)          |                |
| IIIB                             | 75 (78.1%)         | 71 (67.6%)          |                | 56 (71.8%)         | 90 (73.2%)          |                |
| IIIC                             | 16 (16.7%)         | 19 (18.1%)          |                | 16 (20.5%)         | 19 (15.4%)          |                |
| Cell differentiation             |                    |                     | 0.432          |                    |                     | 0.839          |
| WD / MD                          | 85 (88.5%)         | 89 (84.8%)          |                | 68 (87.2%)         | 106 (86.2%)         |                |
| PD / Others                      | 11 (11.5%)         | 16 (15.2%)          |                | 10 (12.8%)         | 17 (13.8%)          |                |
| Lymphatic invasion               |                    |                     | 0.524          |                    |                     | 0.757          |
| No                               | 60 (62.5%)         | 61 (58.1%)          |                | 48 (61.5%)         | 73 (59.3%)          |                |
| Yes                              | 36 (37.5%)         | 44 (41.9%)          |                | 30 (38.5%)         | 50 (40.7%)          |                |
| Vascular invasion                |                    |                     | 0.824          |                    |                     | 0.498          |
| No                               | 85 (88.5%)         | 94 (89.5%)          |                | 68 (87.2%)         | 111 (90.2%)         |                |
| Yes                              | 11 (11.5%)         | 11 (10.5%)          |                | 10 (12.8%)         | 12 (9.8%)           |                |
| Perineural invasion              |                    |                     | 0.894          |                    |                     | 0.961          |
| No                               | 77 (80.2%)         | 85 (81.0%)          |                | 63 (80.8%)         | 99 (80.5%)          |                |
| Yes                              | 19 (19.8%)         | 10 (19.0%)          |                | 15 (19.2%)         | 24 (19.5%)          |                |
| Number of harvested lymph nodes  |                    |                     | 0.002          |                    |                     | 0.055          |
| < 12                             | 41 (42.7%)         | 23 (21.9%)          |                | 31 (39.7%)         | 33 (26.8%)          |                |
| 12 ≤                             | 55 (57.3%)         | 82 (78.1%)          |                | 47 (60.3%)         | 90 (73.2%)          |                |
| Proximal resection margin (cm)   | 11.2 ± 6.0         | 12.4 ± 10.5         | 0.325          | 12.3 ± 11.3        | 11.6 ± 6.4          | 0.560          |
| Distal resection margin (cm)     | 2.4 ± 1.3          | 2.4 ± 1.3           | 0.831          | 2.4 ± 1.3          | 2.4 ± 1.3           | 0.904          |
| Circumferential resection margin |                    |                     | 1.000          |                    |                     | 0.708          |
| Negative                         | 93 (96.9%)         | 101 (96.2%)         |                | 76 (97.4%)         | 118 (95.9%)         |                |
| Positive                         | 3 (3.1%)           | 4 (3.8%)            |                | 2 (2.6%)           | 5 (4.1%)            |                |
| Preoperative CCRT                |                    |                     | 0.508          |                    |                     | 0.505          |
| No                               | 80 (83.3%)         | 91 (86.7%)          |                | 68 (87.2%)         | 103 (83.7%)         |                |
| Yes                              | 16 (16.7%)         | 14 (13.3%)          |                | 10 (12.8%)         | 20 (16.3%)          |                |
| Adjuvant treatment               |                    |                     | 0.392          |                    |                     | 0.148          |
| No                               | 3 (3.2%)           | 7 (6.9%)            |                | 1 (1.3%)           | 9 (7.6%)            |                |
| Chemotherapy                     | 45 (47.9%)         | 42 (41.2%)          |                | 35 (45.5%)         | 52 (43.7%)          |                |
| CCRT                             | 46 (48.9%)         | 53 (52.0%)          |                | 41 (53.2%)         | 58 (48.7%)          |                |
| Preoperative CEA (ng/mL)         |                    |                     | 0.009          |                    |                     | 0.428          |
| ≤ 5                              | 51 (55.4%)         | 72 (73.53%)         |                | 46 (61.3%)         | 77 (67.0%)          |                |
| 5 <                              | 41 (44.6%)         | 26 (26.5%)          |                | 29 (38.7%)         | 38 (33.0%)          |                |

**Table 3.** Expression of nuclear Smad7 in comparison to clinicopathological parameters

|                                  | Smad7-nuclear<br>Negative<br>(n=62) | Smad7-nuclear<br>Positive<br>(n=132) | <i>p</i> value |
|----------------------------------|-------------------------------------|--------------------------------------|----------------|
| Gender                           |                                     |                                      | 0.382          |
| Male                             | 38 (61.3%)                          | 94 (67.6%)                           |                |
| Female                           | 24 (38.7%)                          | 45 (32.4%)                           |                |
| Age at diagnosis (years)         | 57.5 ± 11.5                         | 59.1 ± 12.0                          | 0.382          |
| Tumor size (cm)                  | 4.7 ± 2.1                           | 4.6 ± 1.9                            | 0.918          |
| AJCC stage                       |                                     |                                      | 0.884          |
| IIIA                             | 7 (11.3%)                           | 13 (9.4%)                            |                |
| IIIB                             | 45 (72.6%)                          | 101 (72.7%)                          |                |
| IIIC                             | 10 (16.1%)                          | 25 (18.0%)                           |                |
| Cell differentiation             |                                     |                                      | 0.297          |
| WD / MD                          | 56 (90.3%)                          | 118 (84.9%)                          |                |
| PD / Others                      | 6 (9.7%)                            | 21 (15.1%)                           |                |
| Lymphatic invasion               |                                     |                                      | 0.680          |
| No                               | 36 (58.1%)                          | 85 (61.2%)                           |                |
| Yes                              | 26 (41.9%)                          | 54 (38.8%)                           |                |
| Vascular invasion                |                                     |                                      | 0.917          |
| No                               | 55 (88.7%)                          | 124 (89.2%)                          |                |
| Yes                              | 7 (11.3%)                           | 15 (10.8%)                           |                |
| Perineural invasion              |                                     |                                      | 0.125          |
| No                               | 46 (74.2%)                          | 116 (83.5%)                          |                |
| Yes                              | 16 (25.8%)                          | 23 (16.5%)                           |                |
| Number of harvested lymph nodes  |                                     |                                      | 0.808          |
| < 12                             | 19 (30.6%)                          | 45 (32.4%)                           |                |
| 12 ≤                             | 43 (69.4%)                          | 94 (67.6%)                           |                |
| Proximal resection margin (cm)   | 11.9 ± 7.4                          | 11.8 ± 9.2                           | 0.928          |
| Distal resection margin (cm)     | 2.4 ± 1.2                           | 2.4 ± 1.3                            | 0.878          |
| Circumferential resection margin |                                     |                                      | 0.441          |
| Negative                         | 61 (98.4%)                          | 133 (95.7%)                          |                |
| Positive                         | 1 (1.6%)                            | 6 (4.3%)                             |                |
| Preoperative CCRT                |                                     |                                      | 0.591          |
| No                               | 54 (87.1%)                          | 117 (84.2%)                          |                |
| Yes                              | 8 (12.9%)                           | 22 (15.8%)                           |                |
| Adjuvant treatment               |                                     |                                      | 0.342          |
| No                               | 1 (1.7%)                            | 9 (6.6%)                             |                |
| Chemotherapy                     | 27 (45.0%)                          | 60 (44.1%)                           |                |
| CCRT                             | 32 (53.3%)                          | 67 (49.3%)                           |                |
| Preoperative CEA (ng/mL)         |                                     |                                      | 0.242          |
| ≤ 5                              | 34 (68.6%)                          | 89 (67.4%)                           |                |
| 5 <                              | 24 (41.4%)                          | 43 (32.6%)                           |                |
